# Supplementary material for: The association between insulin resistance and the occurrence of metabolic syndrome in Chinese patients with type 2 diabetes, and the application of Age–Sex–Ethnicity–Specific Severity scoring
Source: Research Square preprint supplement (doi:10.21203/rs.3.rs-8366375/v1), 2026-01-20
Supplement: Supplementary file 1 [file 39450802da7d772ac4194bfc.docx]

# Supplement Table 1 Correlation Analysis of Insulin Resistance Indicators and Metabolic Syndrome Indicators

| **Variable** | **METS-IR** | | **HOMA-IR** | | **UHR** | |
| --- | --- | --- | --- | --- | --- | --- |
| **r** | ***P* value** | **r** | ***P* value** | **r** | ***P* value** |
| WC | 0.695 | **<0.001** | 0.306 | **<0.001** | 0.375 | **<0.001** |
| SBP | 0.140 | **<0.001** | 0.066 | 0.074 | 0.103 | **<0.05** |
| DBP | 0.189 | **<0.001** | 0.076 | **<0.05** | 0.114 | **<0.05** |
| FPG | 0.391 | **<0.001** | 0.455 | **<0.001** | 0.075 | **<0.05** |
| TG | 0.578 | **<0.001** | 0.297 | **<0.001** | 0.501 | **<0.001** |
| HDL-C | -0.601 | **<0.001** | -0.186 | **<0.001** | -0.730 | **<0.001** |
| MetS score | 0.757 | **<0.001** | 0.435 | **<0.001** | 0.538 | **<0.001** |

*P* values < 0.05 are in bold font; WC, waist circumference; SBP, systolic blood pressure; DBP, diastolic blood pressure; FPG, fasting blood glucose; TG, triglycerides; HDL-C: high density lipoprotein-cholesterol; MetS score, metabolic syndrome score;METS-IR, metabolic score for insulin resistance; HOMA-IR, homeostasis model assessment for insulin resistance; UHR, serum uric acid to high density lipoprotein-cholesterol ratio;

Supplement Table 2 Logistic Regression Analysis of Insulin Resistance Indicators and Metabolic Syndrome

| **Variable** | **Unadjusted** | | **Model1** | | | **Model2** | | |
| --- | --- | --- | --- | --- | --- | --- | --- | --- |
| **OR(95%CI)** | ***P* value** | | **OR(95%CI)** | ***P* value** | | **OR(95%CI)** | ***P* value** |
| METS-IR | 1.30 (1.25 - 1.36) | **<0.001** | | 1.35 (1.29 - 1.41) | **<0.001** | | 1.35 (1.29 - 1.42) | **<0.001** |
| HOMA-IR | 1.27 (1.19 - 1.36) | **<0.001** | | 1.30 (1.21 - 1.39) | **<0.001** | | 1.29 (1.20 - 1.39) | **<0.001** |
| UHR | 1.33 (1.27 - 1.40) | **<0.001** | | 1.37 (1.30 - 1.45) | **<0.001** | | 1.39 (1.31 - 1.47) | **<0.001** |

*P* values < 0.05 are in bold font; OR, odds ratio; 95% CI, 95% confidence interval; METS-IR, metabolic score for insulin resistance; HOMA-IR, homeostasis model assessment for insulin resistance; UHR, serum uric acid to high density lipoprotein-cholesterol ratio; Model 1: Adjusted for age, gender, place of residence, and education level; Model 2: Adjusted for age, gender, place of residence, and education level, smoking status, alcohol status, antihypertensive agents, oral hypoglycemic agents, insulin therapy, TC, ALT, and eGFR.

Supplement Table 3 ROC Curve of Insulin Resistance Indicators and Metabolic Syndrome

| **Variable** | **AUC** | **95%CI** | **Sensitivity** | **Specificity** | **Youden** | ***P* value** |
| --- | --- | --- | --- | --- | --- | --- |
| METS-IR | 0.893 | 0.870-0.917 | 0.825 | 0.809 | 0.634 | <0.001 |
| HOMA-IR | 0.746 | 0.709-0.783 | 0.698 | 0.680 | 0.379 | <0.001 |
| UHR | 0.838 | 0.809-0.868 | 0.814 | 0.735 | 0.549 | <0.001 |

*P* values < 0.05 are in bold font; AUC: area under the curve; METS-IR, metabolic score for insulin resistance; HOMA-IR, homeostasis model assessment for insulin resistance; UHR, serum uric acid to high density lipoprotein-cholesterol ratio; ROC analysis was adjusted for age, gender, place of residence, and education level, smoking status, alcohol status, antihypertensive agents, oral hypoglycemic agents, insulin therapy, TC, ALT, and eGFR.
